# Supplementary material for: A Common and Unstable Copy Number Variant Is Associated with Differences in Glo1 Expression and Anxiety-Like Behavior
Source: PLoS One. 2009 Mar 6;4(3):e4649. doi: 10.1371/journal.pone.0004649 (PMC2650792; doi:10.1371/journal.pone.0004649)
Supplement: Table S2 — Primers used to fine map and sequence the boundaries of the chromosome 17 duplication. Real time PCR primers were designed to span the predicted duplication boundaries at ∼5 kb interval. Triple lines indicate >5 kb sequence gaps in the primer survey. Primers outside the duplicated region are highlighted. a Primers used to amplify across the duplication boundary (Dup1F11/Dup1R3 or Dup1F11/Dup1R4) and to screen some inbred and outbred mice. Dup1R11, Dup1F3 or Dup1R11, Dup1F4 were simultaneously added as internal amplification controls. b Primers used for sequencing across the duplication boundary to identify the duplication boundary sequence bases. The template for the sequencing reaction was a PCR product generated using Dup1F11/Dup1R4 in B6AJF1 DNA, which was subcloned into pCR2.1 vector (Invitrogen) according to manufacturer's instructions. c Primers used to screen all strains-inbred, outbred, and wild-caught mice. Primers, qRTPDup2F/2R, span the duplication boundary. d Primers used to amplify and sequence 5′ and 3′ end of ∼1 Kb inside and flanking the duplicated region. Dup1Boundary1F/Dup1Boundary1R and qRTDup1F2/Dup1Boundary2R were used only with strains that contain the duplication. SeqBoundDup1F/Dup1SeqR3 and Dup1Boundary1F/Dup1Boundary4R were used for all strains surveyed for haplotype mapping. (0.08 MB DOC) [file pone.0004649.s002.doc]

**Table S2** -- **Primers used to fine map and sequence the boundaries of the chromosome 17 duplication.**

| Primer Name | Primer Sequence | Position |
| --- | --- | --- |
| Dup1F1 | AAAAGTTCCCTTACAGACTCCTGTT | 30167662 30167686 |
| Dup1R1 | AAAGGGAAATAGTCCAGAGTTCAGT | 30168290 30168314 |
| Dup1F2 | TGAGCCAACAGTGAGATAACAACTC | 30172985 30173009 |
| Dup1R2 | CTTGGTGTTTCTTCAGACTGTCATG | 30173589 30173613 |
| Dup1F3a | TAAGGCTTGCCATGGTGTCCGTTCA | 30177575 30177599 |
| Dup1R3a | GGCCAGGTCAACACATTACTCCCAG | 30177781 30177805 |
| Dup1F4a | CAGTGGCTGGCCTTCTGCAGTAGAA | 30182581 30182605 |
| Dup1R4a | CAATTTTCAGTCGTCAGAGGGGCCA | 30183313 30183337 |
| Dup1F6 | CAGATGTTGCTAAGTCCCATGGTGA | 30625273 30625297 |
| Dup1R6 | TCAGTGTGCATCACCCTGGGACTTG | 30625391 30625415 |
| Dup1F7 | ATTTGCAGATTAGGTTGAGAGTGAG | 30630288 30630312 |
| Dup1R7 | GAAGGTGATCTCACAGACAGAAAGT | 30630635 30630659 |
| Dup1F8 | CTTTGATGGAGTCTTCTCTTGACTC | 30634679 30634703 |
| Dup1R8 | TGCCATCTAGTAAGTACCCAGAGAG | 30634914 30634938 |
| Dup1F10 | ACAAGGCCATGTGTACCGGTTCTGC | 30645896 30645920 |
| Dup1R10 | AAGGATGGCTGAAGCGATGACCAAG | 30646439 30646463 |
| Dup1F11a | TAGAATGTGTTAGGGAACCCACTGC | 30650251 30650275 |
| Dup1R11a | CAACTGTATGGCAAACTGGGAATCC | 30650522 30650546 |
| Dup1F12 | CCAGGGACAGACCATTAAGGAACTC | 30653774 30653798 |
| Dup1R12 | TCTGAGCCCTGAGCAAGGATAGGCA | 30654010 30654034 |
| Dup1SeqF1b | TGCTGCATGTACACCCAAAT | 30650774 30650793 |
| Dup1SeqF2b | CTCTGCCCCAGAGAACAGTC | 30651154 30651173 |
| Dup1SeqF3b | ATCCACCTGAACCTGTTTGC | 30651538 30651557 |
| Dup1SeqF5b | CTGCTGTGTGGCCTCTATCA | 30174442 30174461 |
| Dup1SeqR2b | GGCCTAGCTGCAGAATTGTC | 30174410 30174429 |
| Dup1SeqR3b,d | GAGCTGAAGGGATCTGCAAC | 30175124 30175144 |
| qRTDup1F1b,c | TGCTGCATGTACACCCAAAT | 30650774 30650793 |
| qRTDup1R1b,c | ACAGAAGACCACTGGGATGG | 30650923 30650942 |
| qRTDup1F2b,c,d | CTCTGCCCCAGAGAACAGTC | 30651154 30651173 |
| qRTDup1R2b,c | TGATAGAGGCCACACAGCAG | 30174442 30174461 |
| Dup1Boundary1Fd | TGCTTGGGAGGTAGCCTTTA | 30650485 30650504 |
| Dup1Boundary1Rd | GCAGCACTGAGGGTTTGTCT | 30174562 30174581 |
| Dup1Boundary2Rd | GACCCTGGTATAGCTGTCTCGTAT | 30175348 30175373 |
| SeqBoundDup1Fd | CAGTCGTCGACAGTCATCGT | 30174226 30174245 |
| Dup1Boundary4Rd | AGGCATGTATCCACCTCTGG | 30651398 30651417 |

Real time PCR primers were designed to span the predicted duplication boundaries at ~5kb interval. Triple lines indicate >5kb sequence gaps in the primer survey. Primers outside the duplicated region are highlighted.

a Primers used to amplify across the duplication boundary (Dup1F11/Dup1R3 or Dup1F11/Dup1R4) and to screen some inbred and outbred mice. Dup1R11, Dup1F3 or Dup1R11, Dup1F4 were simultaneously added as internal amplification controls.

bPrimers used for sequencing across the duplication boundary to identify the duplication boundary sequence bases. The template for the sequencing reaction was a PCR product generated using Dup1F11/Dup1R4 in B6AJF1 DNA, which was subcloned into pCR2.1 vector (Invitrogen) according to manufacturer’s instructions.

cPrimers used to screen all strains—inbred, outbred, and wild-caught mice. Primers, qRTPDup2F/2R, span the duplication boundary.

dPrimers used to amplify and sequence 5’ and 3’ end of ~1 Kb inside and flanking the duplicated region. Dup1Boundary1F/Dup1Boundary1R and qRTDup1F2/Dup1Boundary2R were used only with strains that contain the duplication. SeqBoundDup1F/Dup1SeqR3 and Dup1Boundary1F/Dup1Boundary4R were used for all strains surveyed for haplotype mapping.
